# Supplementary material
Source: Springer Nature journal article supplement (https://www.springermedizin.de/resource/supplementary/13054_2011_9762_MOESM7_ESM.pdf/9706984)

Survival (%)

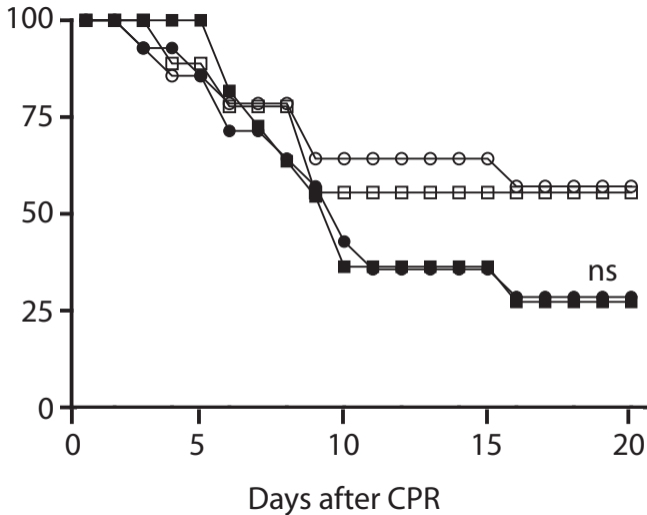

○ PMPs d1 < 10/μL

● PMPs d1 ≥ 10/μL

□ PMPs d2 < 10/μL

■ PMPs d2 ≥ 10/μL

ns

Supplement: MOESM7 [file 9706984]
